# Supplementary material for: PiggyBac transposon tools for recessive screening identify B-cell lymphoma drivers in mice
Source: PubMed Central journal article supplement (PMC6440946; doi:10.1038/s41467-019-09180-3), 2019-03-29
Supplement: 41467_2019_9180_MOESM1_ESM.pdf [file 41467_2019_9180_MOESM1_ESM.pdf]

Weber, de la Rosa, Grove *et al.* “***PiggyBac* transposon tools for recessive screening identify B-cell lymphoma drivers in mice**”

## **Supplementary Information**

Supplementary Figures 1 – 19

Supplementary Tables 1 – 4

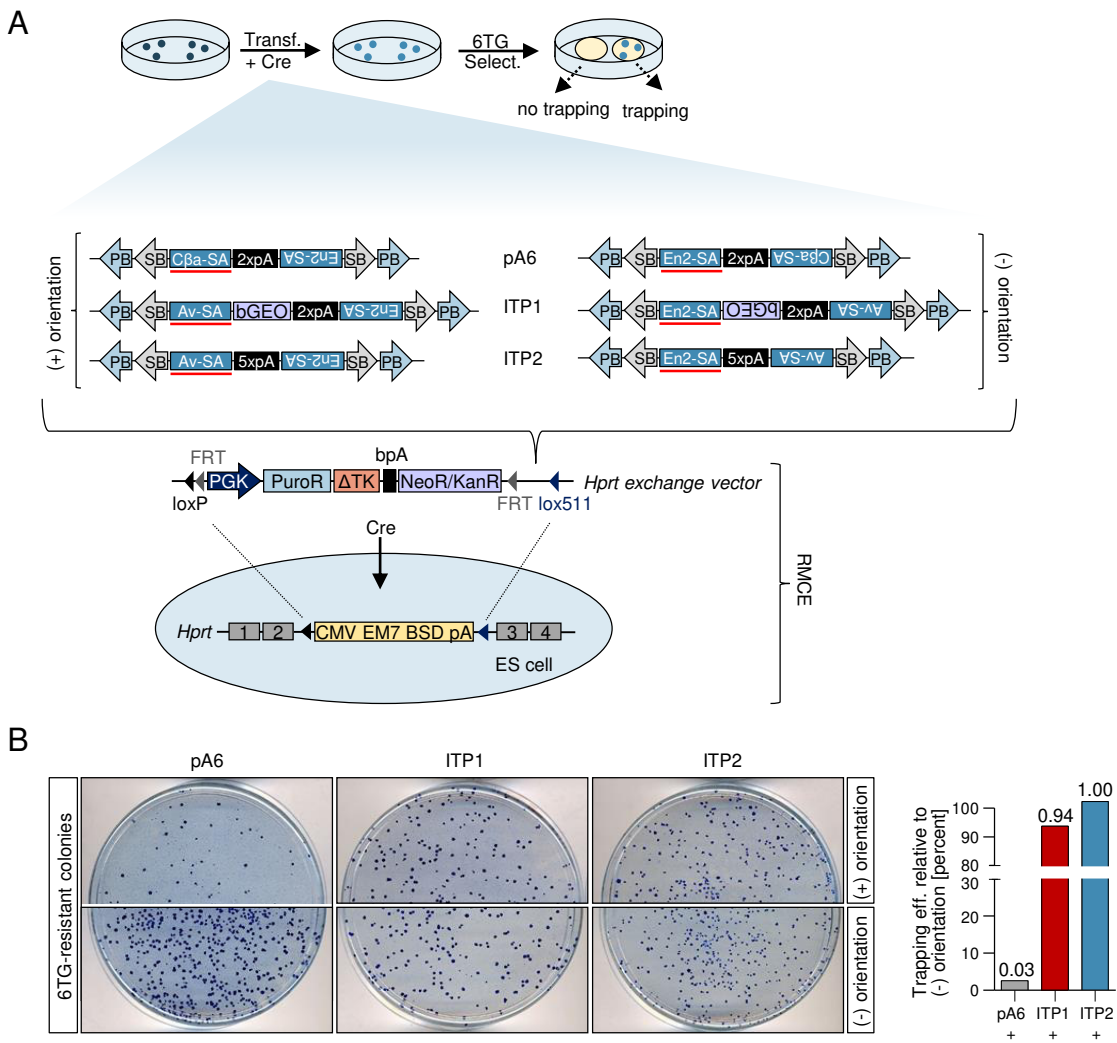

**Supplementary Figure 1. Comparison of gene trapping efficiencies mediated by different splice acceptors using RMCE at the *Hprt* locus.** (A) Transposons carrying different splice acceptors (SA: carp  $\beta$ -actin SA [C $\beta$ a-SA], adenovirus-derived SA [Av-SA] and mouse *Engrailed-2* exon-2 SA [En2-SA]) were cloned into a *hypoxanthine phosphoribosyltransferase* (*Hprt*) exchange vector between a loxP and a lox511 cassette in both orientations (plus (+) and minus (-) orientation). These *Hprt* exchange vectors were electroporated individually together with a Cre expression vector into male embryonic stem (ES) cells, which harbor an “acceptor cassette” knock-in at the X-chromosomal *Hprt* locus. Recombinase mediated cassette exchange (RMCE) led to replacement of a resistance marker cassette (CMV-EM7-BSD-pA) with the transposon-containing exchange cassette (elements between the loxP and lox511 cassette in the *Hprt* vector). ES cells were then selected with 6-thioguanine (6TG). Efficient splicing by the SA within the transposon leads to a premature termination of transcription resulting in a non-functional *Hprt* protein. *Hprt* deficiency induces 6TG resistance. (B) After selection, cells were stained with crystal violet and 6TG-resistant colonies were counted. The Av-SA and the En2-SA showed comparable gene-trapping efficiencies while C $\beta$ a-SA was less efficient in this very sensitive assay (6TG resistance is not compatible with residual “leakiness”). Transf., transfection; Select., selection; PGK, phosphoglycerate-kinase promoter; PuroR, puromycin resistance;  $\Delta$ TK, truncated herpes simplex virus thymidine kinase; bpA, bovine growth hormone polyadenylation signal; NeoR/KanR, neomycin/kanamycin resistance; FRT, FLP recognition target site; LoxP/Lox511, Cre recognition target site; CMV, cytomegalovirus promoter; EM7, bacterial promoter; BSD, blasticidin resistance; PB, *PiggyBac*; SB, *Sleeping Beauty*; pA, SV40 bidirectional polyadenylation signal; bGEO,  $\beta$ -galactosidase/neomycin resistance reporter; Eff, efficiency.

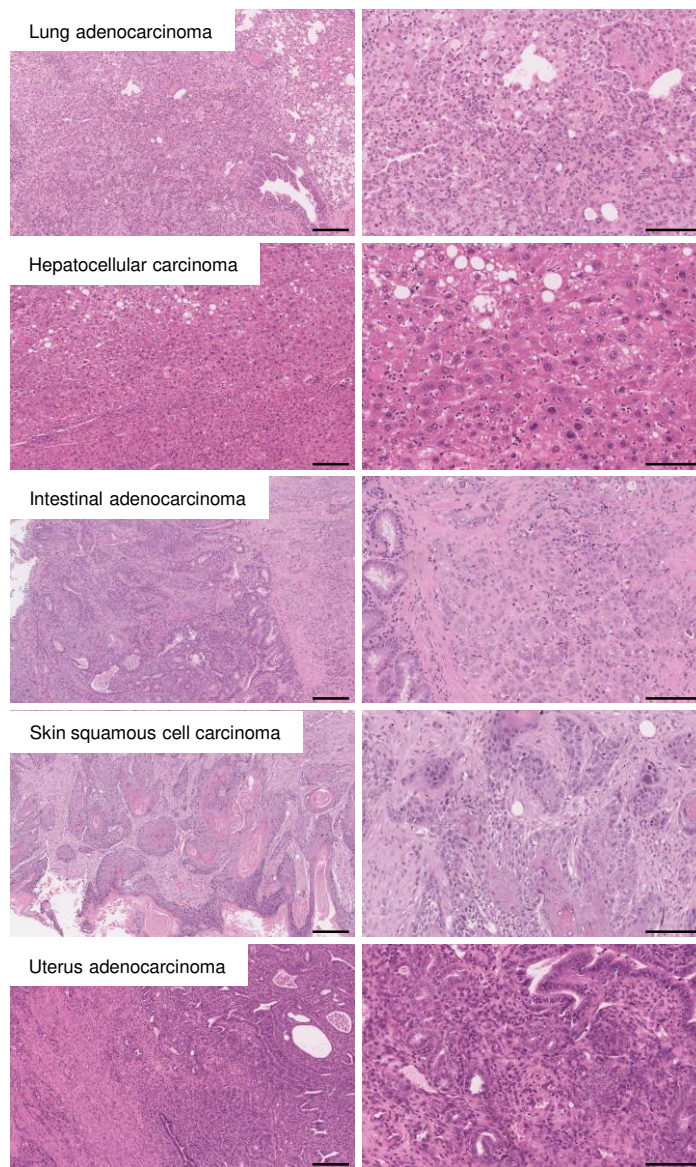

**Supplementary Figure 2. Solid tumor development in *IPB* mice.** Microscopic images show hematoxylin and eosin stainings of representative solid tumor cases from *ITP2-M; Rosa26<sup>PB/+</sup>; Blm<sup>m3/m3</sup>* (*IPB*) mice. Scale bars: 200 μm (left panel), 100 μm (right panel).

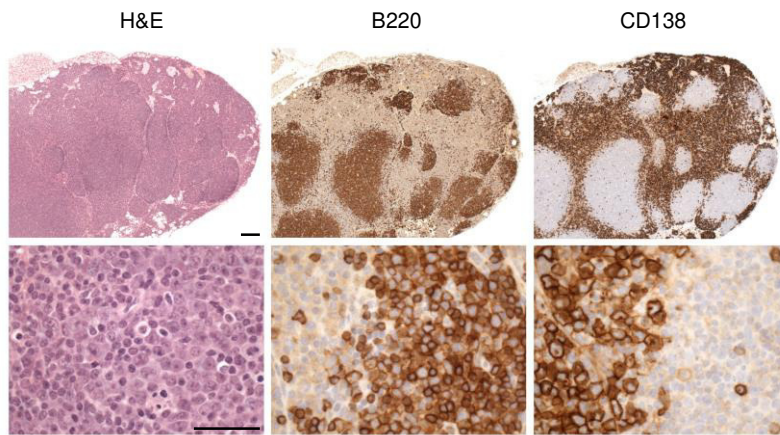

**Supplementary Figure 3. DLBCLs in *IPB* mice occasionally show plasmacytic differentiation.** Microscopic images show a case of diffuse large B-cell lymphoma (DLBCL) with plasmacytic differentiation. These tumors consist of large-sized neoplastic cells with abundant cytoplasm and a round nucleus with vesicular chromatin and two or more nucleoli (hematoxylin and eosin staining; H&E). A sub-set of tumor cells shows strong expression of plasma cell markers (CD138) and loss of B-cell markers (B220/CD45R). In the representative images above, note the mirror-effect shown by the B220 and CD138 immunohistochemistry, pointing to a transition from mature cells (B220 positive, center of the follicle) to plasmacytoid cells (CD138 positive, follicular periphery). Scale bars: 200  $\mu\text{m}$  (top panel), 50  $\mu\text{m}$  (bottom panel).



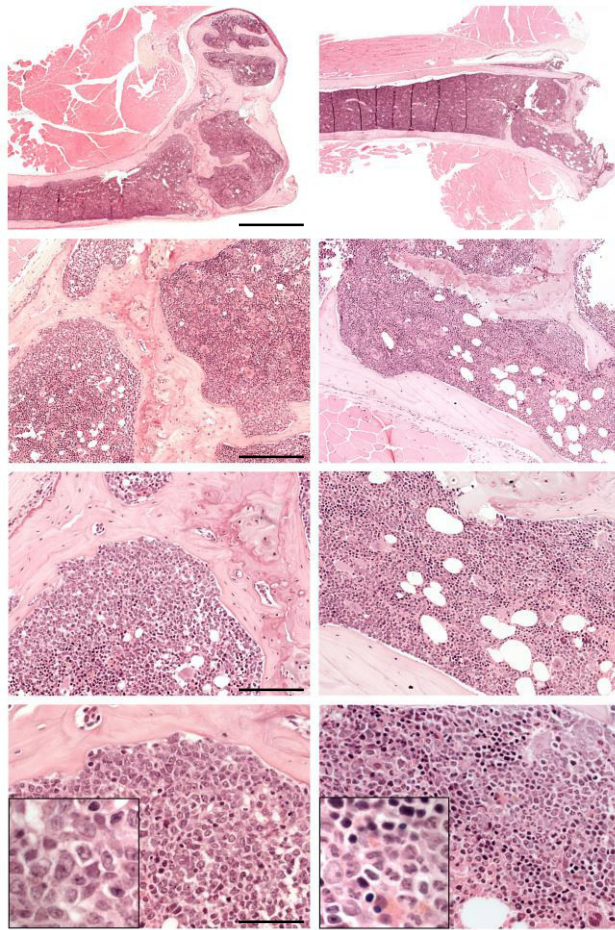

**Supplementary Figure 4. Bone marrow infiltration in *IPB* mice with DLBCL.** Microscopic images (showing hematoxylin and eosin stainings) present diffuse large B-cell lymphoma cases with initial paratrabecular infiltration (left panel) and without (right panel). Scale bars: 1 mm (first row), 200  $\mu\text{m}$  (second row), 100  $\mu\text{m}$  (third row) and 50  $\mu\text{m}$  (last row). Inserts in the last row are in 630x magnification.

IPB\_1.2a

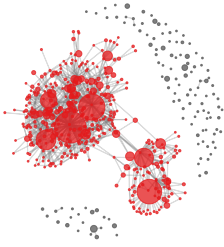

**HC**  
Tr: 38157  
Cf: 0.98

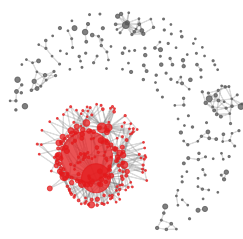

**LC**  
Tr: 64216  
Cf: 0.97

IPB\_1.2d

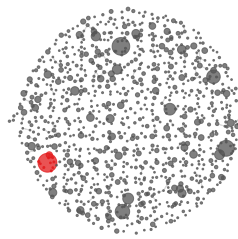

**HC**  
Tr: 22022  
Cf: 0.12

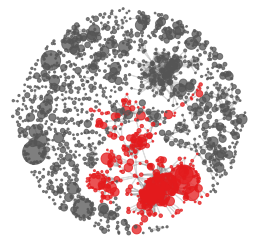

**LC**  
Tr: 86521  
Cf: 0.47

IPB\_1.4a

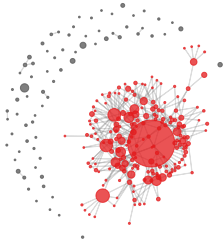

**HC**  
Tr: 46313  
Cf: 0.98

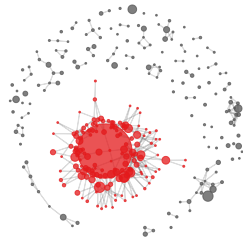

**LC**  
Tr: 67272  
Cf: 0.96

IPB\_2.4b

Not enough reads

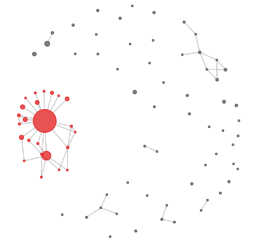

**HC**

**LC**  
Tr: 5077  
Cf: 0.95

IPB\_3.4h

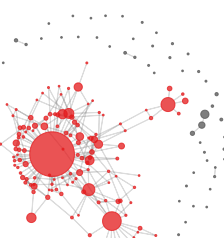

**HC**  
Tr: 41008  
Cf: 0.99

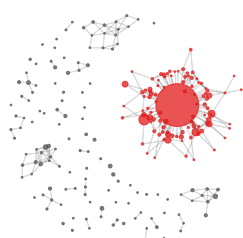

**LC**  
Tr: 31482  
Cf: 0.98

IPB\_3.5d

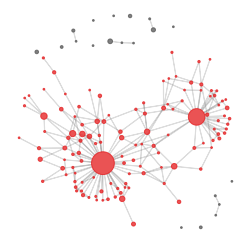

**HC**  
Tr: 7427  
Cf: 0.98

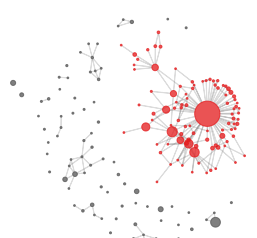

**LC**  
Tr: 8821  
Cf: 0.91

IPB\_4.1d

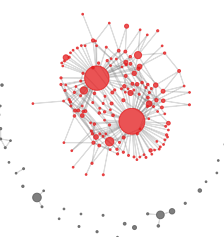

**HC**  
Tr: 13890  
Cf: 0.95

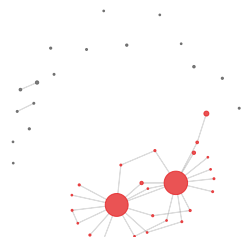

**LC**  
Tr: 9386  
Cf: 0.99

IPB\_4.6f

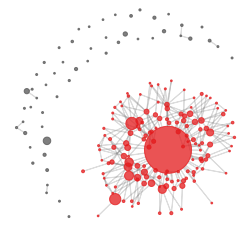

**HC**  
Tr: 43196  
Cf: 0.99

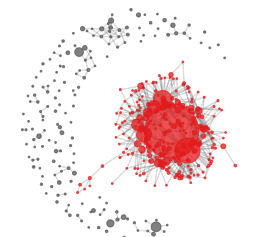

**LC**  
Tr: 74220  
Cf: 0.98

IPB\_5.2d

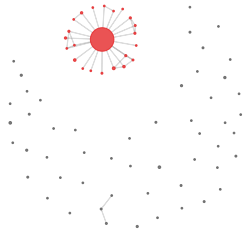

**HC**  
Tr: 5028  
Cf: 0.97

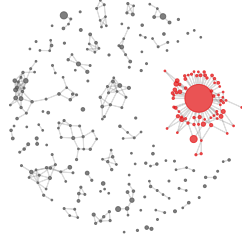

**LC**  
Tr: 9891  
Cf: 0.86

IPB\_10.4a

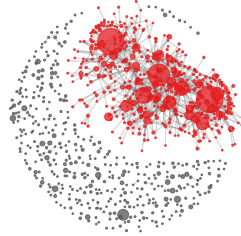

**HC**  
Tr: 31664  
Cf: 0.91

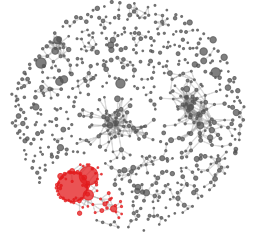

**LC**  
Tr: 21572  
Cf: 0.63

IPB\_10.4b

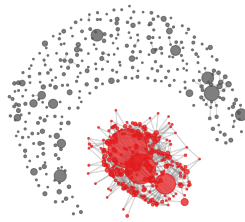

**HC**  
Tr: 45717  
Cf: 0.83

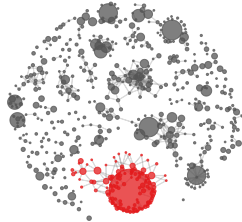

**LC**  
Tr: 57567  
Cf: 0.54

IPB\_10.4c

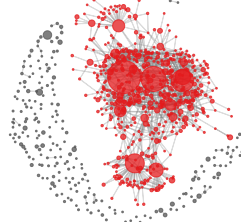

**HC**  
Tr: 37301  
Cf: 0.96

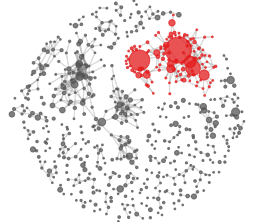

**LC**  
Tr: 17970  
Cf: 0.72

IPB\_10.6a

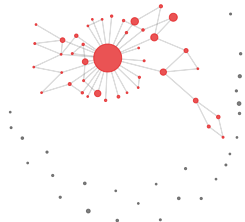

**HC**  
Tr: 9139  
Cf: 0.98

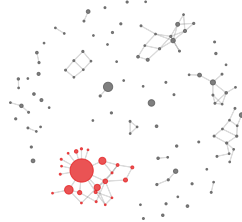

**LC**  
Tr: 6191  
Cf: 0.85

IPB\_11.1d

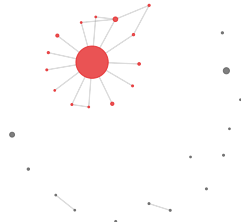

**HC**  
Tr: 12663  
Cf: 0.99

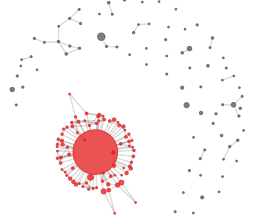

**LC**  
Tr: 33955  
Cf: 0.98

**Supplementary Figure 5. Clonality network plots of monoclonal DLBCL samples.** Clonality network plots display clonal structures of immunoglobulin heavy and light chains of monoclonal diffuse large B-cell lymphoma samples from *ITP2-M;Rosa26<sup>PB/+</sup>;Blm<sup>m3/m3</sup>* (IPB) mice. Each clone (defined by a unique CDR3 sequence) constitutes a node of the clonality network. The size of the node scales with the third root of the count of the reads assigned to it. A link between two nodes was drawn if the clones mapped to identical V and J genes and differed by at most 1 bp in their CDR3 sequence. The complexity of the branching of a clone (i.e. number of subclones) is a measure for the grade of somatic hypermutation. Clones defined by a unique V(D)J rearrangement that contained more than 10% of the total reads are highlighted in color. Samples were defined as monoclonal if the main clone contained more than 40% of the total reads and the clone with the second highest read count constituted less than 10% of the total read count. HC, Heavy chain; LC; Light chain; Tr: Total reads; Cf: Fraction of clone.

IPB\_1.5b

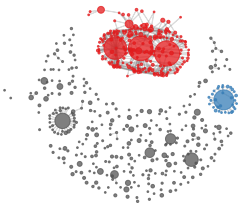**HC**

Tr: 25595  
 Cf: 0.67  
 Cf: 0.12

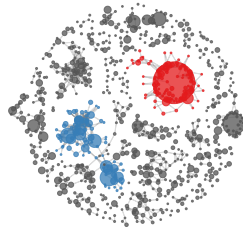**LC**

Tr: 53872  
 Cf: 0.53  
 Cf: 0.16

IPB\_3.5a

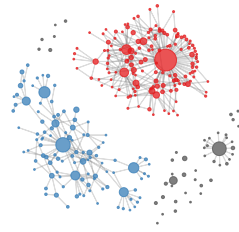**HC**

Tr: 11099  
 Cf: 0.53  
 Cf: 0.34

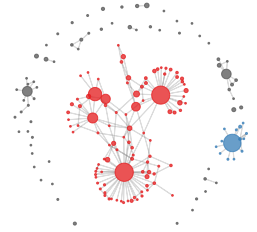**LC**

Tr: 9939  
 Cf: 0.70  
 Cf: 0.20

IPB\_6.3b

Not enough reads

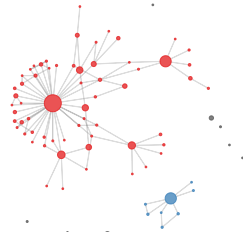**HC****LC**

Tr: 3957  
 Cf: 0.83  
 Cf: 0.14

IPB\_9.3b

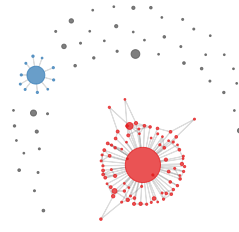**HC**

Tr: 19387  
 Cf: 0.86  
 Cf: 0.11

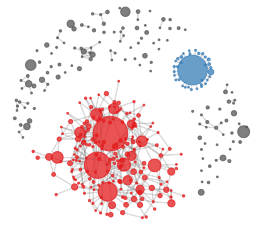**LC**

Tr: 44206  
 Cf: 0.72  
 Cf: 0.22

IPB\_9.6a

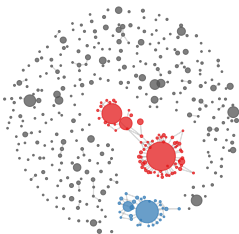**HC**

Tr: 22946  
 Cf: 0.55  
 Cf: 0.20

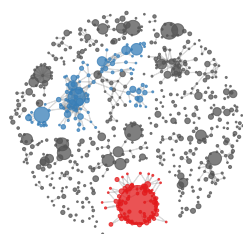**LC**

Tr: 50336  
 Cf: 0.45  
 Cf: 0.13

IPB\_11.3b

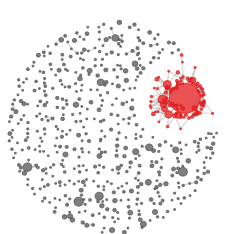**HC**

Tr: 18253  
 Cf: 0.55

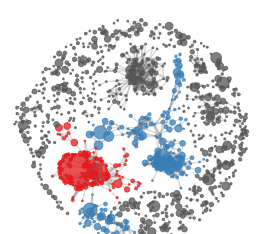**LC**

Tr: 43164  
 Cf: 0.38  
 Cf: 0.28

IPB\_12.1b

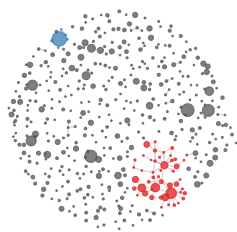**HC**

Tr: 10626  
 Cf: 0.15  
 Cf: 0.11

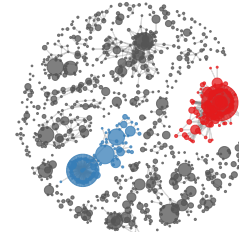**LC**

Tr: 70991  
 Cf: 0.32  
 Cf: 0.26



**Supplementary Figure 6. Clonality network plots of biclonal DLBCL samples.** Clonality network plots display clonal structures of immunoglobulin heavy and light chains of biclonal diffuse large B-cell lymphoma samples from *ITP2-M;Rosa26<sup>PB/+</sup>;Blm<sup>m3/m3</sup>* (IPB) mice. Each clone (defined by a unique CDR3 sequence) constitutes a node of the clonality network. The size of the node scales with the third root of the count of the reads assigned to it. A link between two nodes was drawn if the clones mapped to identical V and J genes and differed by at most 1 bp in their CDR3 sequence. The complexity of the branching of a clone (i.e. number of subclones) is a measure for the grade of somatic hypermutation. Clones defined by a unique V(D)J rearrangement that contained more than 10% of the total reads are highlighted in color. Samples were defined as biclonal if two clones, each constituting more than 10% of the total number of reads, were present. HC, Heavy chain; LC; Light chain; Tr: Total reads; Cf: Fraction of clone.

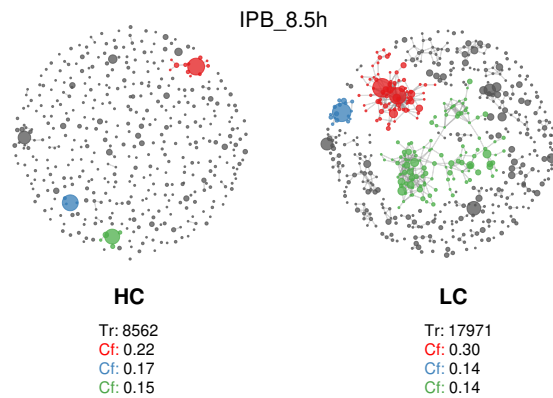

**Supplementary Figure 7. Clonality network plots of a polyclonal DLBCL sample.** Clonality network plots display clonal structures of immunoglobulin heavy and light chains of a polyclonal diffuse large B-cell lymphoma sample from an *ITP2-M;Rosa26<sup>PB/+</sup>;Blm<sup>m3/m3</sup>* (IPB) mouse. Each clone (defined by a unique CDR3 sequence) constitutes a node of the clonality network. The size of the node scales with the third root of the count of the reads assigned to it. A link between two nodes was drawn if the clones mapped to identical V and J genes and differed by at most 1 bp in their CDR3 sequence. The complexity of the branching of a clone (i.e. number of subclones) is a measure for the grade of somatic hypermutation. Clones defined by a unique V(D)J rearrangement that contained more than 10% of the total reads are highlighted in color. Samples were defined as polyclonal if three or more clones, each constituting more than 10% of the total number of reads, were identified. HC, Heavy chain; LC; Light chain; Tr: Total reads; Cf: Fraction of clone.

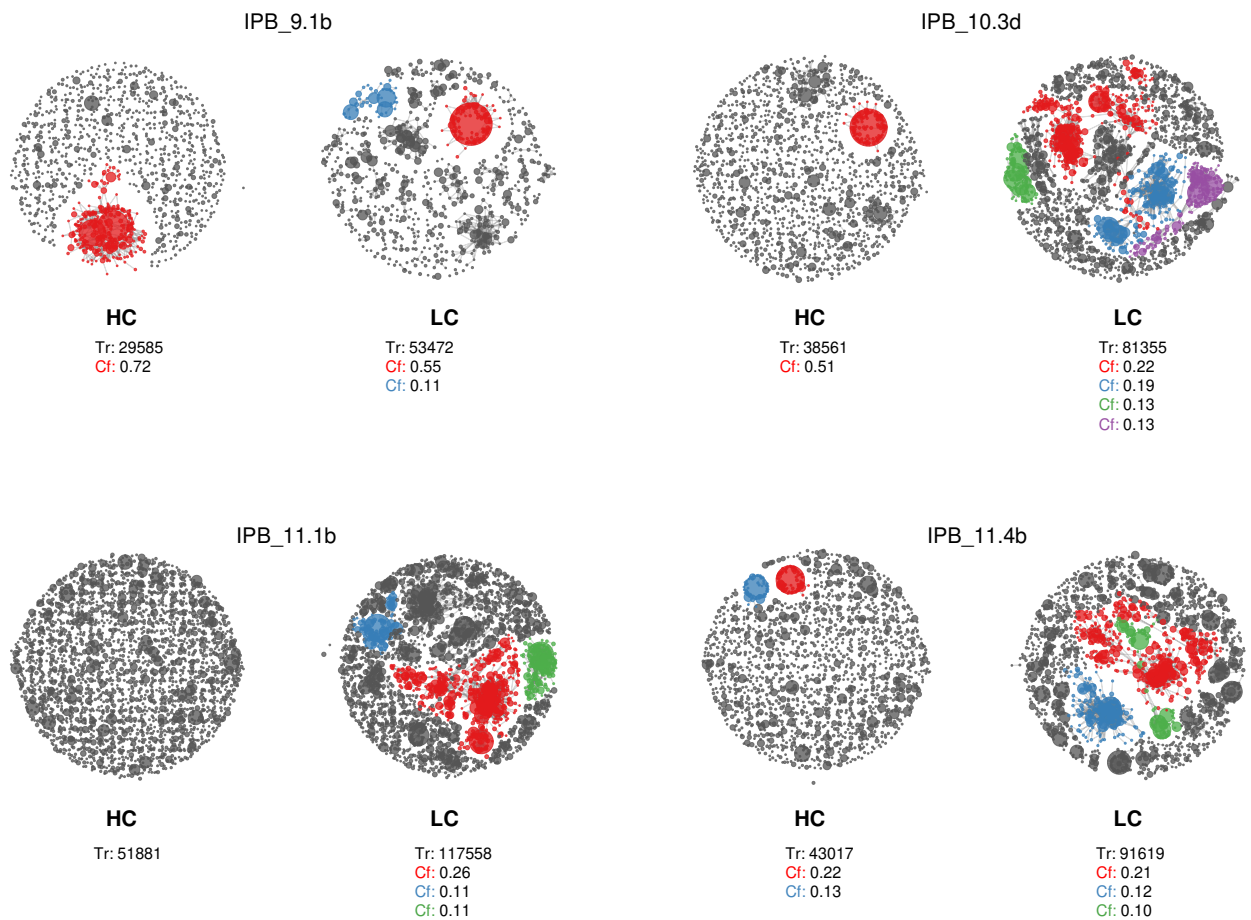

**Supplementary Figure 8. Clonality network plots of samples with divergences in the clonal structure between heavy and light chain.** Clonality network plots display clonal structures of immunoglobulin heavy and light chains of diffuse large B-cell lymphoma samples from *ITP2-M;Rosa26<sup>PB/+</sup>;Blm<sup>m3/m3</sup>* (IPB) mice. Each clone (defined by a unique CDR3 sequence) constitutes a node of the clonality network. The size of the node scales with the third root of the count of the reads assigned to it. A link between two nodes was drawn if the clones mapped to identical V and J genes and differed by at most 1 bp in their CDR3 sequence. The complexity of the branching of a clone (i.e. number of subclones) is a measure for the grade of somatic hypermutation. Clones defined by a unique V(D)J rearrangement that contained more than 10% of the total reads are highlighted in color. Displayed are clonality network plots of samples which show divergences in the clonal structure between heavy and light chain. These samples were excluded from further analyses. HC, Heavy chain; LC; Light chain; Tr: Total reads; Cf: Fraction of clone.

A

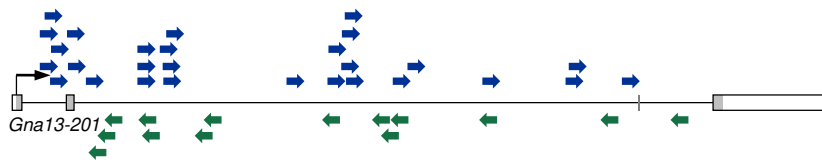

B

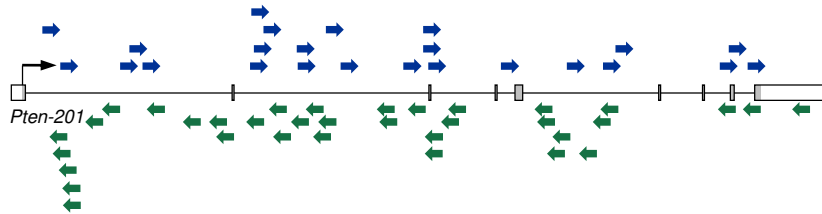

**Supplementary Figure 9. Tumor suppressor genes typically show an inactivating *ITP2* insertion pattern.** Transposon insertions that were identified by quantitative transposon insertion site sequencing (QiSeq) in diffuse large B-cell lymphoma (DLBCL) samples from *ITP2-M; Rosa26<sup>PB/+</sup>; Blm<sup>m3/m3</sup>* mice overtly show patterns consistent with gene-inactivation being the cancer-promoting mechanism: *ITP2* insertions are distributed over the whole length of a gene without a bias for a specific transposon orientation (indicated by blue and green arrows). As examples, the insertion patterns of two known DLBCL tumor suppressor genes (**A**) *Gna13* and (**B**) *Pten* are shown. Each arrow represents an individual insertion. Exons are displayed by light gray boxes and 5' and 3' untranslated regions are white. The black arrow indicates the transcription start site. Illustrated are the consensus coding sequences (CCDS) of the genes. Transposon insertions with a read coverage  $\geq 20$  are shown.

A

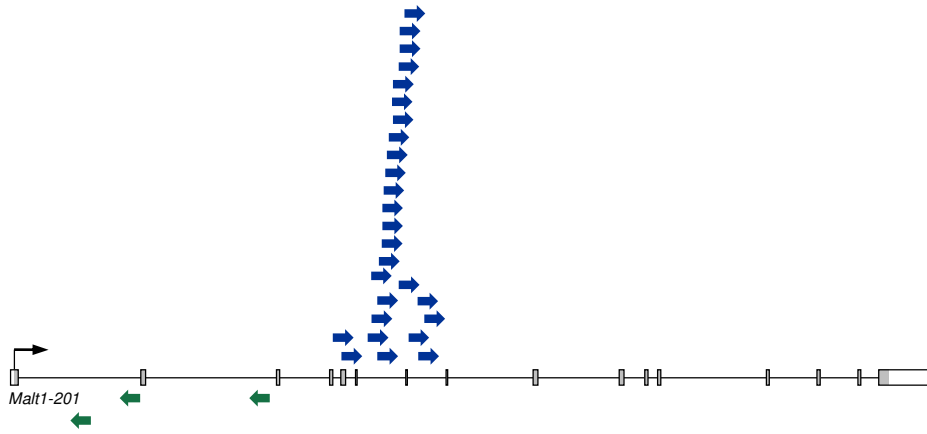

B

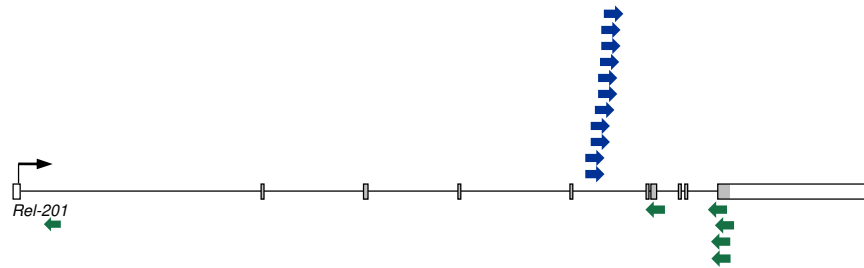

**Supplementary Figure 10. Oncogenes are rarely activated by *ITP2* insertions.** Transposon insertions that were identified by quantitative transposon insertion site sequencing (QiSeq) in diffuse large B-cell lymphoma (DLBCL) samples from *ITP2-M;Rosa26<sup>PB/+</sup>;Blm<sup>m3/m3</sup>* mice typically show a gene-inactivating pattern. In rare instances, activation of oncogenes by *ITP2* insertions was observed. Transposon insertions in the DLBCL oncogenes (A) *Malt1* and (B) *Rel* are shown. *ITP2* insertions show a clear orientation bias (depicted by blue and green arrows) suggesting possible gene activation by a cryptic weak promoter element within transposon inverted terminal repeats. Additionally, in the case of *Rel*, transposon insertion within the 3' untranslated region might indicate interference with protein translation. Each arrow represents an individual insertion. Exons are displayed by light gray boxes and 5' and 3' untranslated regions by white ones. The black arrow indicates the transcription start site. Illustrated are the consensus coding sequences (CCDS) of the genes. Transposon insertions with a read coverage  $\geq 20$  are shown.



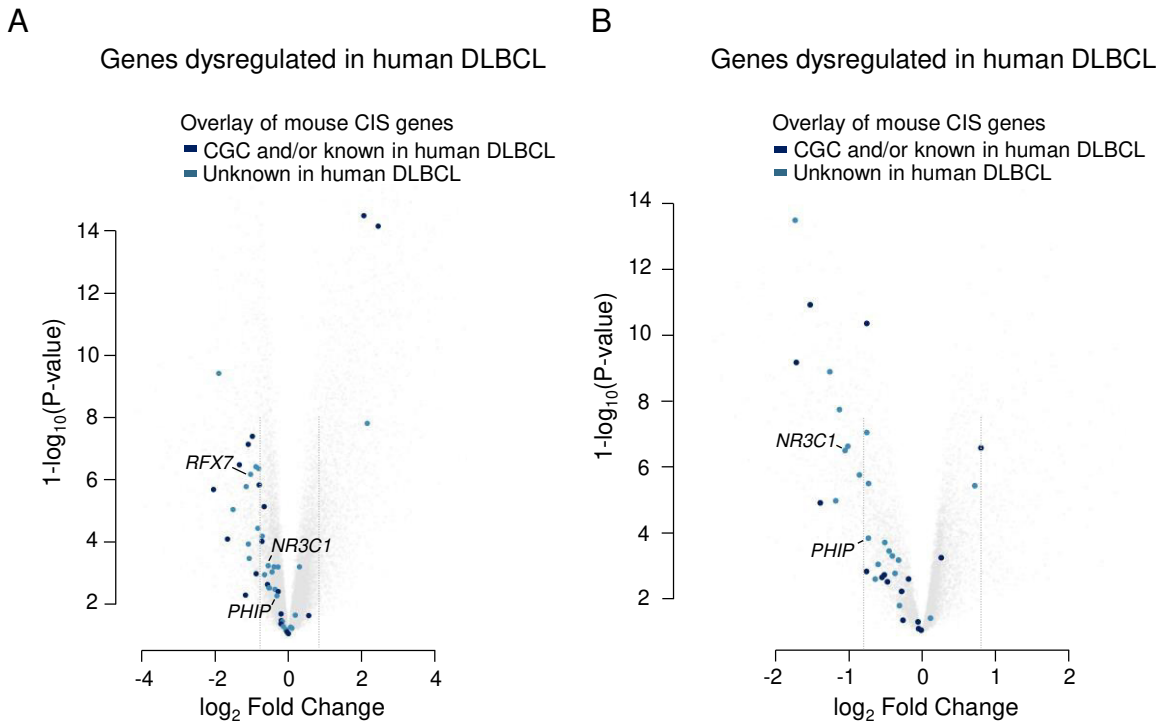

**Supplementary Figure 11. Genes from the top 50 CIS list are downregulated in human B-cell lymphomas.** Volcano plots show negatively (left) and positively (right) regulated genes in human diffuse large B-cell lymphoma samples relative to non-malignant B cells (centroblasts). Gray lines indicate  $\log_2$  fold changes of -0.8 and 0.8. Dark blue colored points represent human orthologues of genes from the top 50 CIS list that are included in the Cancer Gene Census (CGC) database and/or have already implicated roles in diffuse large B-cell lymphoma (DLBCL). Light blue colored points depict candidate genes with unknown function in DLBCL. Data from publically available datasets (**A**) GSE12195 and (**B**) GSE2350.

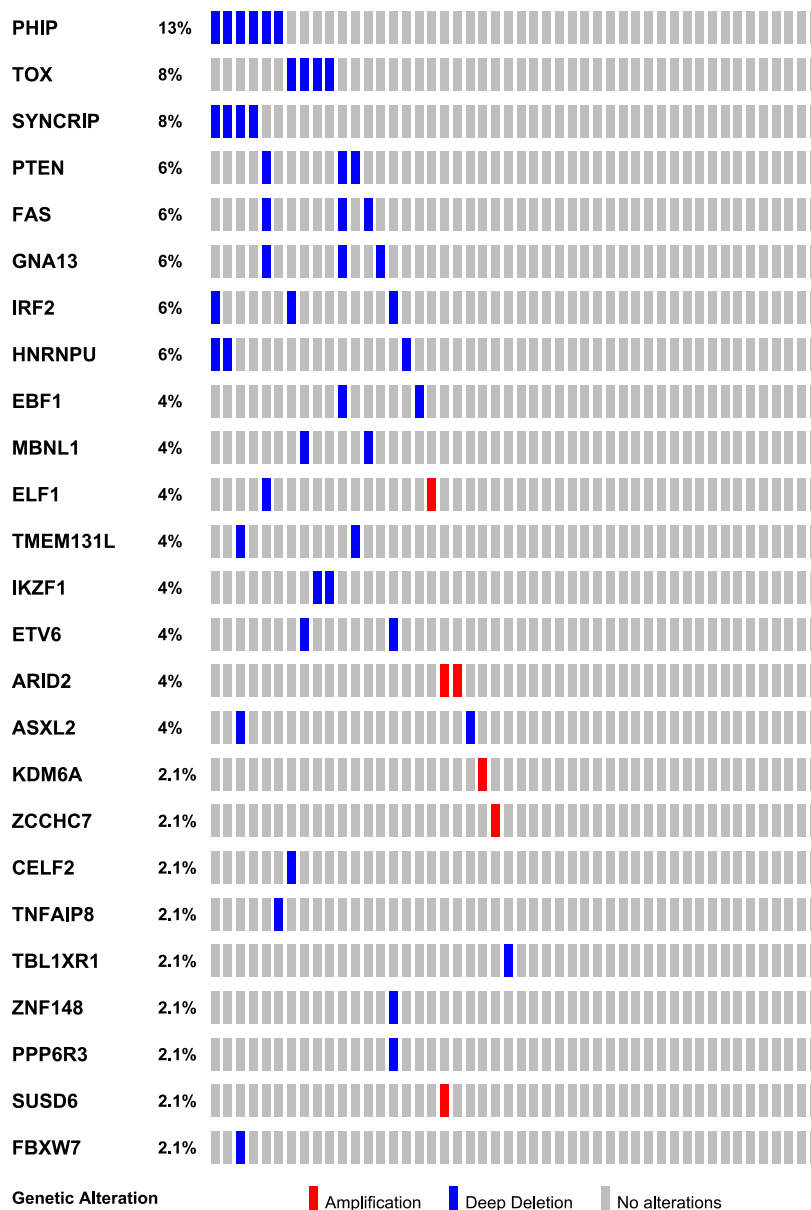

**Supplementary Figure 12. Oncoplots showing copy number alterations of candidate tumor suppressor genes in human DLBCL.** The existence of copy number alterations (CNA) in human orthologues of the 50 top CIS genes in our screen was interrogated in the TCGA-DLBC dataset (Pan-Cancer Atlas from Cancer Genome Atlas (TCGA) consortium). Featured are genes with CNAs, as estimated by GISTIC 2.0 analysis. Source and output from cBioPortal (<http://www.cbioportal.org/>). The two genes with oncogenic insertions in our screen (*Malt1* and *Rel*) were not included in the analysis. Note that heterozygous deletions are not shown.

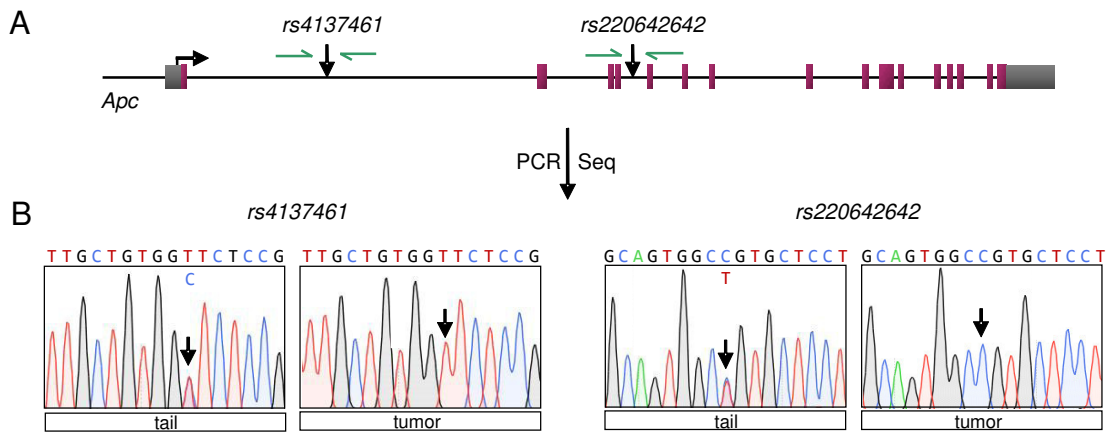

**Supplementary Figure 13. Analysis of loss of heterozygosity in an *IPB* tumor cell line.** For loss of heterozygosity (LOH) analysis, two single nucleotide polymorphism (SNP) containing regions within *Apc* were amplified and sequenced in DNA from an small intestine tumor cell line (harboring a high coverage *ITP2* insertion in *Apc*) and tail of an *ITP2-M;Rosa26<sup>PB/+</sup>;Blm<sup>m3/m3</sup>* (*IPB*) mouse. **(A)** Structure of the mouse *Apc* gene with indicated positions of SNPs *rs4137461* and *rs220642642* (black arrows) and PCR primers (green arrows). **(B)** Sequencing results of tumor cell line and tail DNA for each SNP show that LOH occurs in the tumor. Seq., sequencing.

A

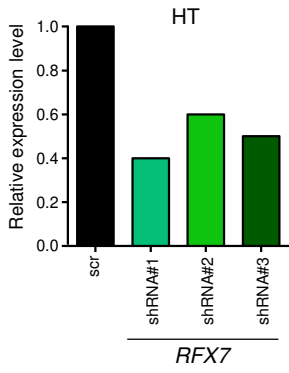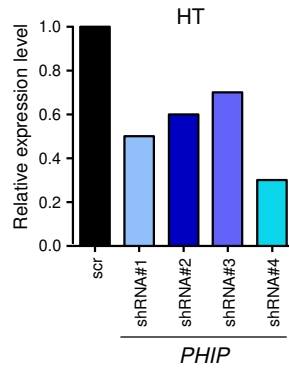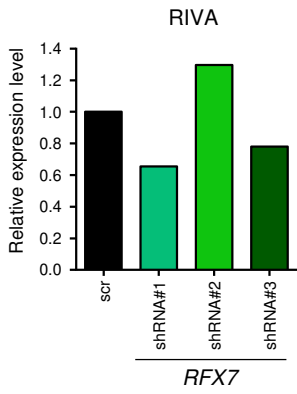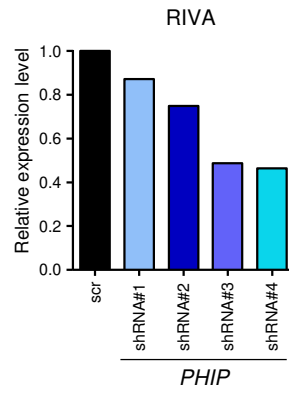

B

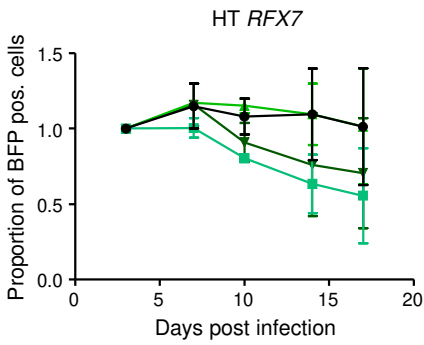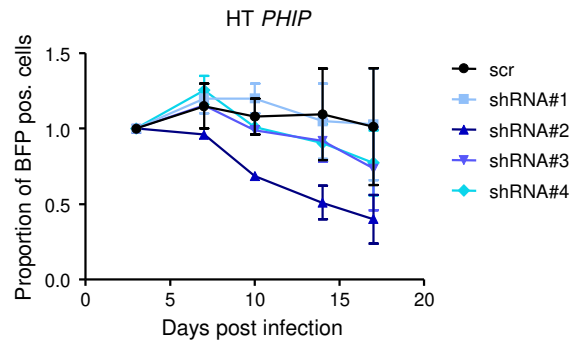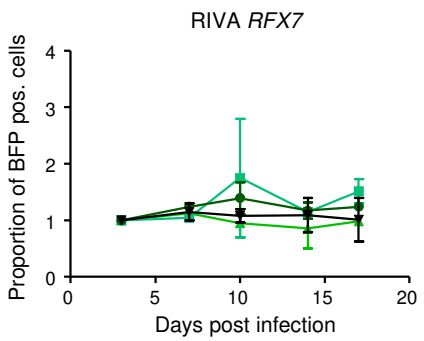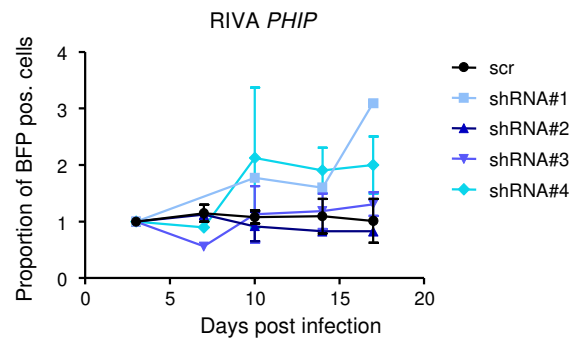

**Supplementary Figure 14. Functional cell culture based competition assays for *in vitro* analysis of gene function.** Cell culture based competition assays were performed to analyze if knockdown of the candidate genes *RFX7* and *PHIP* influences cell proliferation *in vitro*. For this, the human GCB DLBCL cell line HT and the human ABC DLBCL cell line RIVA were transduced with lentiviral vectors expressing blue fluorescent protein (BFP) and either a scrambled shRNA control (scr) or shRNAs targeting *RFX7* (3 shRNAs) or *PHIP* (4 shRNAs). **(A)** For analysis of knockdown efficiencies, BFP positive HT and RIVA cells were sorted 17 days post infection. *RFX7* and *PHIP* expression was determined by real time quantitative PCR (qPCR) using primers specific for *RFX7* and *PHIP* transcripts. For normalization of RNA input, GAPDH qPCR was performed. Transduced cells (with the exception of RIVA cells targeted with *RFX7* shRNA#2) showed a knockdown in *RFX7* or *PHIP* expression. One out of two replicates is shown. **(B)** For competition assays, transduced BFP positive cells were co-cultured with non-transduced cells and the proportion of BFP positive cells was analyzed on day 3, 7, 10, 14 and 17 post infection. Percentage of BFP positive cells was normalized to day 3 post transduction. Data was analyzed with a 2-way ANOVA allowing for interaction effects. No significant time specific effects between conditions (*RFX7* knockdown, *PHIP* knockdown and scr cells) were detected for all experiments. Line charts show the course of the proportion of BFP positive cells over 14 days. Data represented as mean of two replicates  $\pm$  standard error of the mean. Pos, positive.



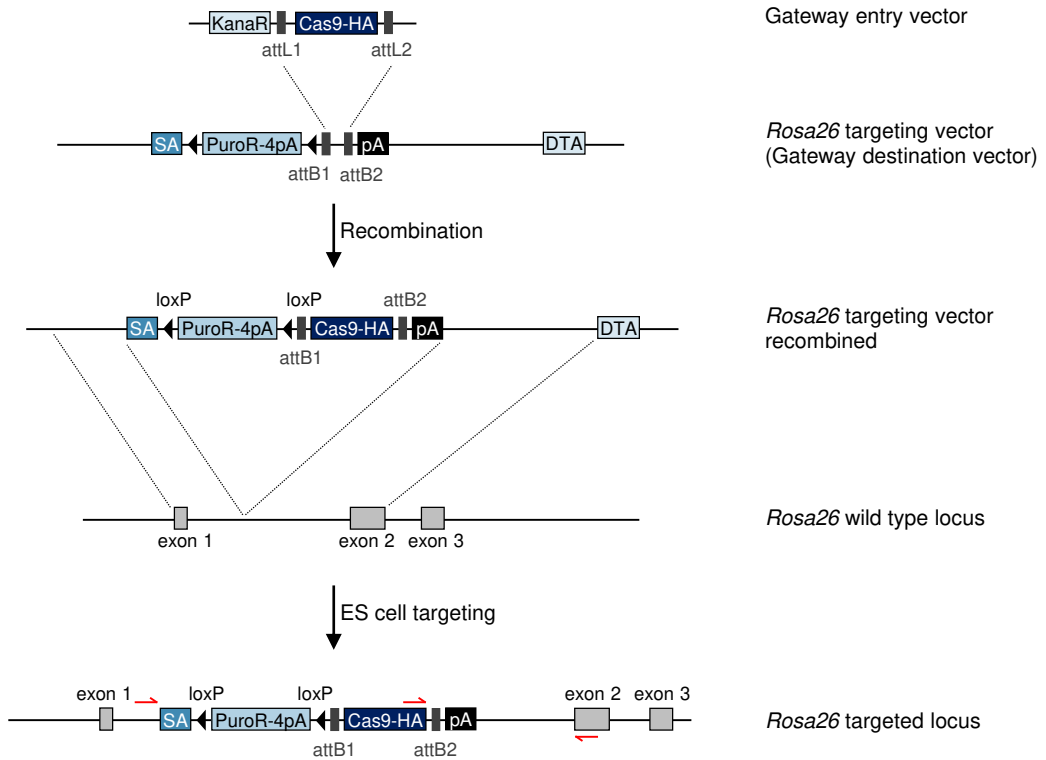

**Supplementary Figure 15. Alleles and vectors for generation of the *Rosa26*<sup>Cas9</sup> knock-in mouse line.** To generate knock-in mice expressing Cas9 from the endogenous *Rosa26* promoter, we first cloned a human codon-optimized hemagglutinin (HA)-tagged Cas9 (Cas9-HA) sequence derived from *Streptococcus pyogenes* into a Gateway-compatible entry vector. We then shuttled the Cas9-HA sequence into the *Rosa26*-targeting Gateway destination vector with a loxP-flanked puromycin-resistance-containing stop cassette. Embryonic stem (ES) cell (JM8) targeting, blastocyst injections and subsequent breeding steps were performed using standard protocols/techniques. Upon generation of conditional *Rosa26*<sup>LSL-Cas9</sup> knock-in mice, we derived a constitutive *Rosa26*<sup>Cas9</sup> mouse line by deletion of the loxP-flanked stop cassette in the germline using *Tg*<sup>Actb-Cre</sup> mice. *Rosa26*<sup>LSL-Cas9</sup> and *Rosa26*<sup>Cas9</sup> mice were established and maintained on a pure *C57BL/6* background. Genotyping primers are indicated by red arrows. KanaR, kanamycin resistance; attL1/attL2, Gateway recombination sites; SA, splice acceptor; PuroR, puromycin resistance; attB1/attB2, Gateway recombination sites; pA, polyadenylation signal; DTA, diphtheria toxin alpha.

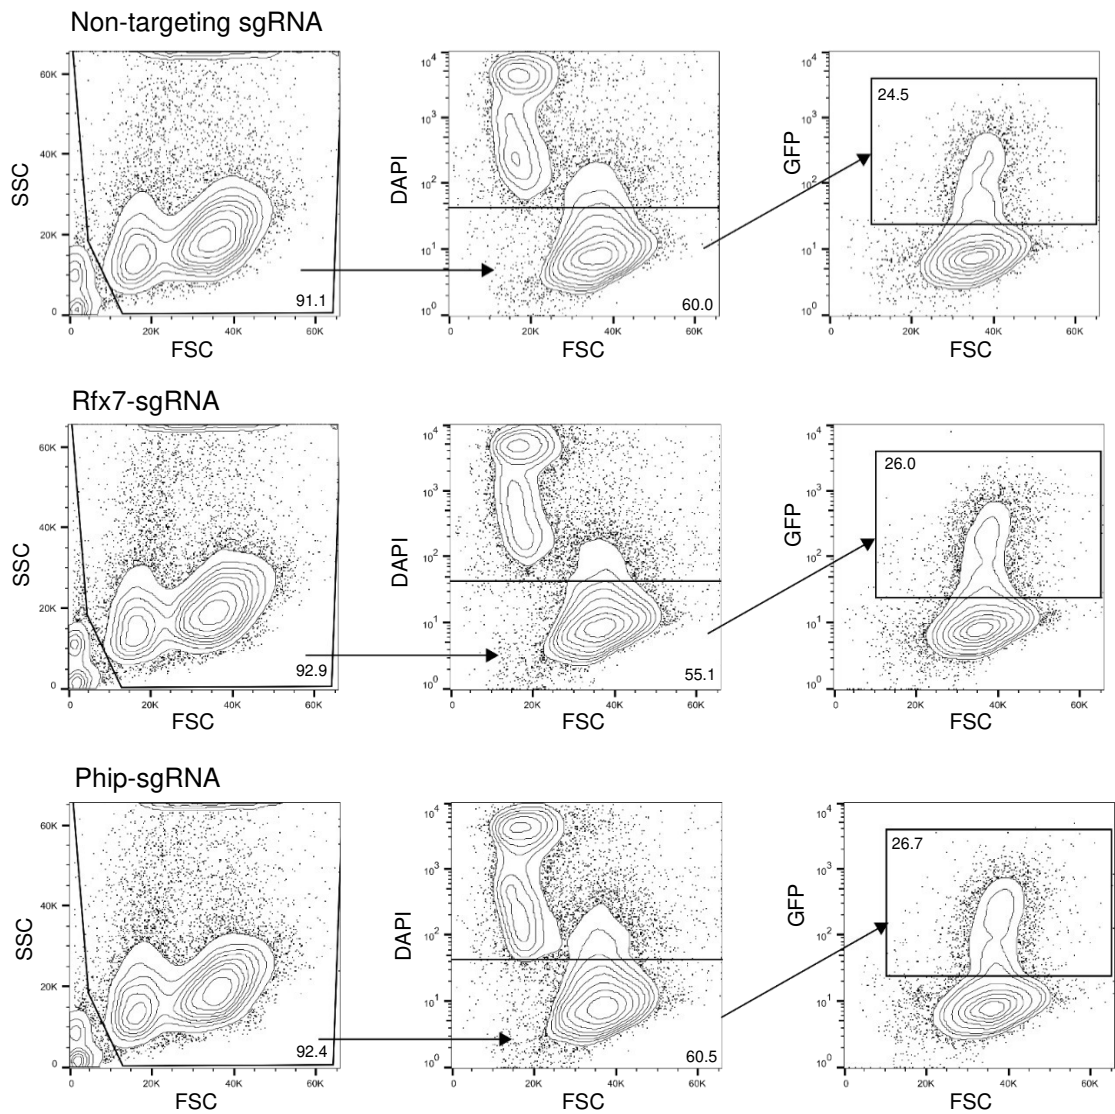

**Supplementary Figure 16. Infection of fetal liver cells for CRISPR/Cas9-based *in vivo* validation model.** Representative contour plots from flow cytometry analysis of fetal liver cells infected with GFP-tagged lentiviral single guide RNA (sgRNA) vectors. Left plots: Forward scatter (FSC; x axis) and side scatter (SSC; y axis) measurements; gating to exclude cell debris. Middle plots: DAPI fluorescence on y axis; gating to exclude dead cells. Right plots: GFP fluorescence on y axis; gating to quantify GFP positive viable cells.

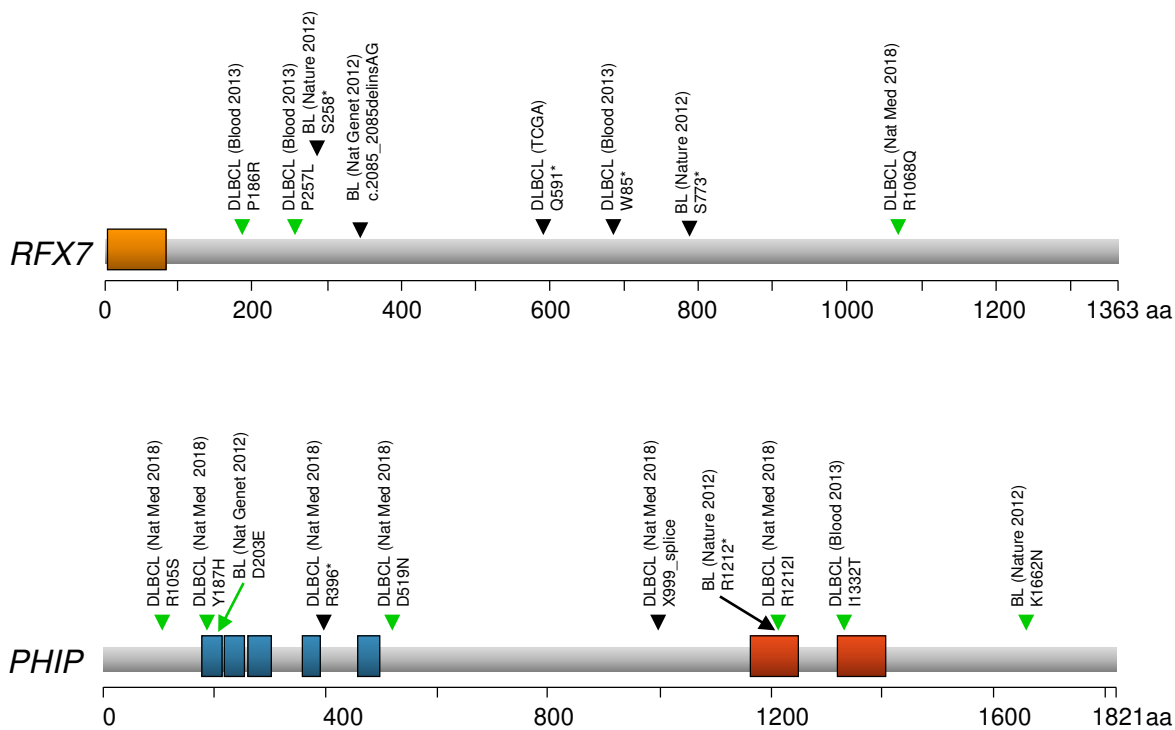

**Supplementary Figure 17. *RFX7* and *PHIP* mutations in human B-cell lymphoma.** Schemes display location of mutations (single nucleotide variations and small insertions/deletions) within *RFX7* (above) and *PHIP* (below) in human diffuse large B-cell lymphoma (DLBCL) and Burkitt lymphoma (BL). Truncating mutations are displayed by black arrow heads, missense mutations by green arrow heads. Mutation data was sourced from the following studies: TCGA diffuse large B-cell lymphoma (DLBC) dataset (TCGA Research Network: <http://cancergenome.nih.gov>), Schmitz *et al.* Nature 2012, Morin *et al.* Blood 2013, Richter *et al.* Nature Genetics 2012, Chapuy *et al.* Nature Medicine 2018. Indicated functional protein domains: PHIP: WD40 domain (blue) and bromodomain (red), RFX7: RFX DNA-binding domain (orange).

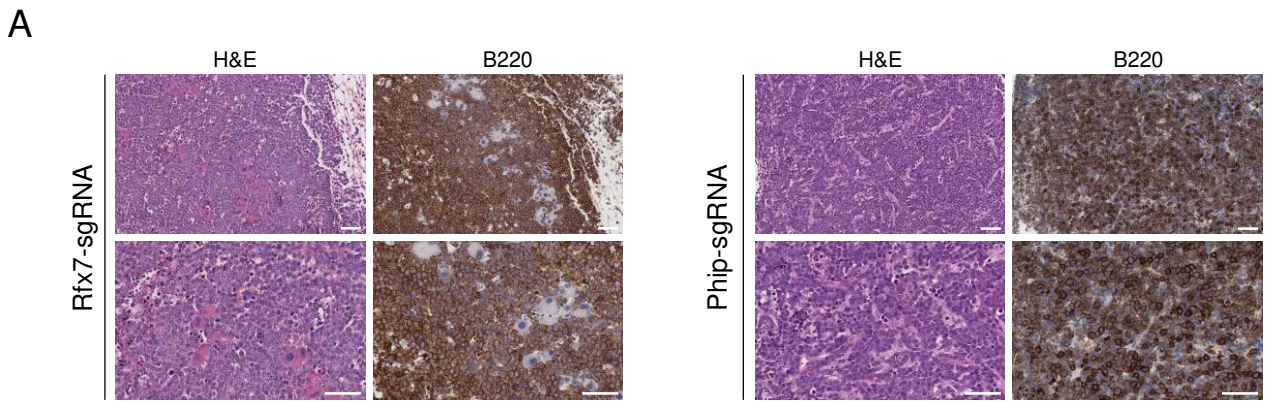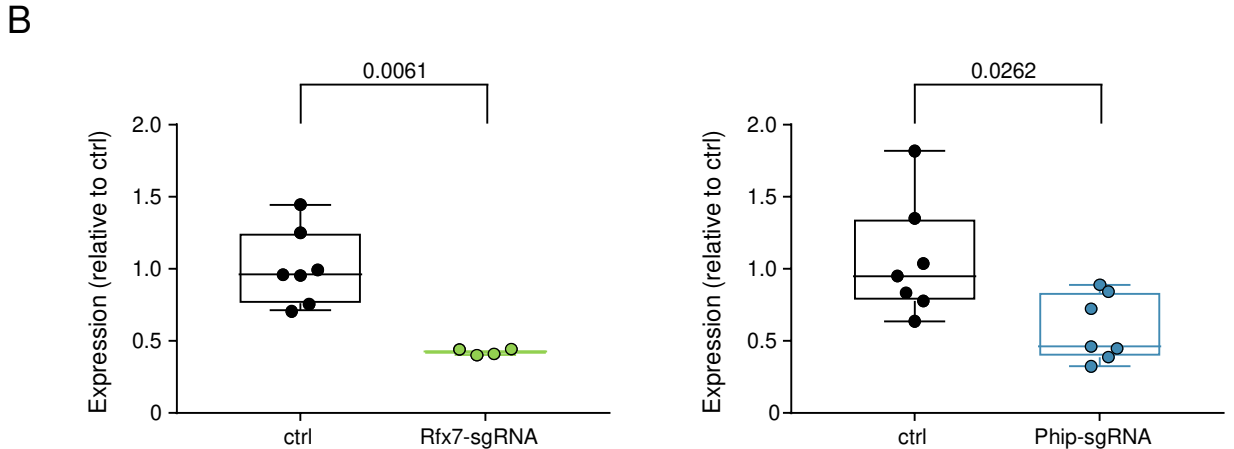

**Supplementary Figure 18. Analysis of tumors from the CRISPR/Cas9-based *in vivo* validation model.** (A) Representative microscopic images of tumors from mice reconstituted with Rfx7-sgRNA (left) and Phip-sgRNA (right) *Eμ-myc;Rosa26<sup>Cas9</sup>* HSPCs. Mice developed B-cell lymphomas exhibiting strong B220/CD45R positivity (right panels). Scale bars: 50 μm. H&E, Hematoxylin and eosin staining. (B) Box plots showing Rfx7 (left) and Phip (right) expression analyzed by real time quantitative PCR (qPCR) in tumors from mice reconstituted with Rfx7-sgRNA ( $n = 4$ ) and Phip-sgRNA ( $n = 7$ ) *Eμ-myc;Rosa26<sup>Cas9</sup>* HSPCs, respectively. Expression in tumors from the Rfx7- and Phip-sgRNA cohorts was compared to expression levels in endogenous tumors ( $n = 7$ ) from *Eμ-myc* mice. For normalization of RNA input, Gapdh qPCR was performed. Whiskers: minimum to maximum; horizontal line: median. A Mann-Whitney test was performed to test the significance of change in expression. Ctrl, controls.

**A**

|           | Rfx7 sgRNA                                                                                                                           |                      |                                 |
|-----------|--------------------------------------------------------------------------------------------------------------------------------------|----------------------|---------------------------------|
| wild type | AGCAAATGCATGCCTTTTCCTGGATTTCGAAATACCTTAGAGGAGCATCCTGAGACGTCACTC                                                                      |                      | Mutant read frequency (percent) |
| Tu-1      | AGCAAATGCATGCCTTTTCCTGGAGTTTCGAAATACCTTAGAGGAGCATCCTGAGACGTCACTC<br>AGCAAATGCATGCCTTTTCCTGGATCTTCGAAATACCTTAGAGGAGCATCCTGAGACGTCACTC | 2-bp-ins<br>2-bp-ins | 59.4                            |
| Tu-2      | AGCAAATGCATGCCTTTTCCTGGAGTTTCGAAATACCTTAGAGGAGCATCCTGAGACGTCACTC<br>AGCAAATGCATGCCTTTTCCTGGAGGGCC TTCGAAATACCTTAGAGGAGCATCCTGAGACGT  | 1-bp-ins<br>5-bp-ins | 92.3                            |
| Tu-3      | AGCAAATGCATGCCTTTTCCTGGAAATTCGAAATACCTTAGAGGAGCATCCTGAGACGTCACTC<br>AGCAAATGCATGCCTTTTCCTGGAGGAGTTTCGAAATACCTTAGAGGAGCATCCTGAGACGT   | 1-bp-ins<br>5-bp-ins | 52.9                            |

  

**B**

|           | Phip sgRNA                                                                                                                      |                       |                                 |
|-----------|---------------------------------------------------------------------------------------------------------------------------------|-----------------------|---------------------------------|
| wild type | TGTATTGCACTGTGGTGGCCTATCCAACGGATCTAAGTACAATTAACAAAGACTGGAGAAC                                                                   |                       | Mutant read frequency (percent) |
| Tu-1      | TGTATTGCACTGTGGTGGCC-----AACGGATCTAAGTACAATTAACAAAGACTGGAGAAC<br>TGTATTGCACTGTGGTGGCCTATCCAAGTACAATTAAACAAGT AACGGATCTAAGTACAAT | 5-bp-del<br>19-bp-ins | 91.9                            |
| Tu-2      | TGTATTGCACTGT-----TAAACAAAGACTGGAGAAC<br>TGTATTGCACTGTGGTGGCCTATCCCCCAACGGATCTAAGTACAATTAACAAAGACTGGGA                          | 30-bp-del<br>4-bp-ins | 97.0                            |
| Tu-3      | TGTATTGCACTGTGGTGGCCTATC-----GGATCTAAGTACAATTAACAAAGACTGGAGAAC<br>TGTATTGCACTGTGGTGGCCTATC-AACGGATCTAAGTACAATTAACAAAGACTGGAGAAC | 4-bp-del<br>1-bp-del  | 94.5                            |

**Supplementary Figure 19. Amplicon-based next-generation sequencing for indel identification at target sites.** For detection of insertions/deletions (indels) in tumors derived from the CRISPR/Cas9-based *in vivo* validation approach, amplicon-based next-generation sequencing of the target regions followed by indel analysis was performed. For all analyzed samples ( $n = 3$  tumors per gene), the presence of two clonal indels was identified at the predicted Cas9 cleavage site. Mutant read frequencies represent the fraction of mutant-reads/all-reads at individual target sites. **(A)** At the *Rfx7* target region, small insertions (1 bp to 5 bp) were present while **(B)** at the *Phip* target site, indels ranged from 1 bp to 30 bp. Indels are indicated by red characters and the protospacer adjacent motifs next to the single guide RNAs are shaded in green and blue. Del, deletion; ins, insertion; sgRNA, single guide RNA.



| Mouse ID | Cohort                                           | Diagnosis                                                                              |
|----------|--------------------------------------------------|----------------------------------------------------------------------------------------|
| PB_1.3b  | <i>Rosa26<sup>PB/+</sup>;Blm<sup>m3/m3</sup></i> | Diffuse large B-cell lymphoma                                                          |
| PB_1.4g  | <i>Rosa26<sup>PB/+</sup>;Blm<sup>m3/m3</sup></i> | B-cell lymphoma                                                                        |
| PB_1.6e  | <i>Rosa26<sup>PB/+</sup>;Blm<sup>m3/m3</sup></i> | T-cell lymphoblastic lymphoma                                                          |
| PB_1.7b  | <i>Rosa26<sup>PB/+</sup>;Blm<sup>m3/m3</sup></i> | Lymphoma                                                                               |
| PB_2.4c  | <i>Rosa26<sup>PB/+</sup>;Blm<sup>m3/m3</sup></i> | Diffuse large B-cell lymphoma                                                          |
| PB_3.2c  | <i>Rosa26<sup>PB/+</sup>;Blm<sup>m3/m3</sup></i> | Diffuse large B-cell lymphoma                                                          |
| PB_3.3a  | <i>Rosa26<sup>PB/+</sup>;Blm<sup>m3/m3</sup></i> | Diffuse large B-cell lymphoma                                                          |
| PB_3.3b  | <i>Rosa26<sup>PB/+</sup>;Blm<sup>m3/m3</sup></i> | Diffuse large B-cell lymphoma                                                          |
| PB_3.3d  | <i>Rosa26<sup>PB/+</sup>;Blm<sup>m3/m3</sup></i> | Diffuse large B-cell lymphoma                                                          |
| PB_3.3e  | <i>Rosa26<sup>PB/+</sup>;Blm<sup>m3/m3</sup></i> | Diffuse large B-cell lymphoma with plasmacytic differentiation                         |
| PB_3.4f  | <i>Rosa26<sup>PB/+</sup>;Blm<sup>m3/m3</sup></i> | Invasive adenocarcinoma of the uterus, low grade dysplasia in the small intestine      |
| PB_3.4g  | <i>Rosa26<sup>PB/+</sup>;Blm<sup>m3/m3</sup></i> | Diffuse large B-cell lymphoma                                                          |
| PB_3.5b  | <i>Rosa26<sup>PB/+</sup>;Blm<sup>m3/m3</sup></i> | Low grade dysplasia in the small intestine                                             |
| PB_3.6e  | <i>Rosa26<sup>PB/+</sup>;Blm<sup>m3/m3</sup></i> | Lymphoma, Invasive adenocarcinoma of the uterus                                        |
| PB_3.6g  | <i>Rosa26<sup>PB/+</sup>;Blm<sup>m3/m3</sup></i> | Uterus sarcoma                                                                         |
| PB_4.5e  | <i>Rosa26<sup>PB/+</sup>;Blm<sup>m3/m3</sup></i> | Lymphoma                                                                               |
| PB_4.5f  | <i>Rosa26<sup>PB/+</sup>;Blm<sup>m3/m3</sup></i> | B-cell lymphoma                                                                        |
| PB_4.5h  | <i>Rosa26<sup>PB/+</sup>;Blm<sup>m3/m3</sup></i> | Squamous cell carcinoma of the skin                                                    |
| PB_4.6e  | <i>Rosa26<sup>PB/+</sup>;Blm<sup>m3/m3</sup></i> | Diffuse large B-cell lymphoma and histiocytic sarcoma                                  |
| PB_5.1d  | <i>Rosa26<sup>PB/+</sup>;Blm<sup>m3/m3</sup></i> | Hepatocellular carcinoma                                                               |
| PB_5.1e  | <i>Rosa26<sup>PB/+</sup>;Blm<sup>m3/m3</sup></i> | Diffuse large B-cell lymphoma                                                          |
| PB_5.2c  | <i>Rosa26<sup>PB/+</sup>;Blm<sup>m3/m3</sup></i> | Diffuse large B-cell lymphoma with plasmacytic differentiation and histiocytic sarcoma |
| PB_5.2g  | <i>Rosa26<sup>PB/+</sup>;Blm<sup>m3/m3</sup></i> | Lymphoma                                                                               |
| PB_5.4e  | <i>Rosa26<sup>PB/+</sup>;Blm<sup>m3/m3</sup></i> | Lymphoma                                                                               |
| PB_5.7a  | <i>Rosa26<sup>PB/+</sup>;Blm<sup>m3/m3</sup></i> | Leukemia                                                                               |
| PB_5.7b  | <i>Rosa26<sup>PB/+</sup>;Blm<sup>m3/m3</sup></i> | Papillary adenocarcinoma of the lung                                                   |
| PB_5.7d  | <i>Rosa26<sup>PB/+</sup>;Blm<sup>m3/m3</sup></i> | Lymphoma                                                                               |
| PB_6.2f  | <i>Rosa26<sup>PB/+</sup>;Blm<sup>m3/m3</sup></i> | Diffuse large B-cell lymphoma with plasmacytic differentiation                         |
| PB_6.2g  | <i>Rosa26<sup>PB/+</sup>;Blm<sup>m3/m3</sup></i> | Lymphoma                                                                               |
| PB_6.2h  | <i>Rosa26<sup>PB/+</sup>;Blm<sup>m3/m3</sup></i> | Lymphoma                                                                               |
| PB_6.3h  | <i>Rosa26<sup>PB/+</sup>;Blm<sup>m3/m3</sup></i> | Diffuse large B-cell lymphoma                                                          |
| PB_6.3i  | <i>Rosa26<sup>PB/+</sup>;Blm<sup>m3/m3</sup></i> | Lymphoma                                                                               |
| PB_6.3j  | <i>Rosa26<sup>PB/+</sup>;Blm<sup>m3/m3</sup></i> | Lymphoma                                                                               |
| PB_6.4i  | <i>Rosa26<sup>PB/+</sup>;Blm<sup>m3/m3</sup></i> | Lymphoma                                                                               |
| PB_7.1c  | <i>Rosa26<sup>PB/+</sup>;Blm<sup>m3/m3</sup></i> | Diffuse large B-cell lymphoma and B-cell lymphoblastic lymphoma                        |
| PB_7.1d  | <i>Rosa26<sup>PB/+</sup>;Blm<sup>m3/m3</sup></i> | Diffuse large B-cell lymphoma                                                          |
| PB_7.2c  | <i>Rosa26<sup>PB/+</sup>;Blm<sup>m3/m3</sup></i> | Lymphoma                                                                               |
| PB_7.3c  | <i>Rosa26<sup>PB/+</sup>;Blm<sup>m3/m3</sup></i> | Invasive adenocarcinoma of the uterus                                                  |
| PB_8.3h  | <i>Rosa26<sup>PB/+</sup>;Blm<sup>m3/m3</sup></i> | Lymphoma                                                                               |
| PB_8.3i  | <i>Rosa26<sup>PB/+</sup>;Blm<sup>m3/m3</sup></i> | Histiocytic sarcoma                                                                    |
| PB_8.5f  | <i>Rosa26<sup>PB/+</sup>;Blm<sup>m3/m3</sup></i> | Uterus sarcoma                                                                         |
| IB_10.1a | <i>ITP2-M;Blm<sup>m3/m3</sup></i>                | Lymphoma                                                                               |
| IB_10.7e | <i>ITP2-M;Blm<sup>m3/m3</sup></i>                | Lymphoma                                                                               |
| IB_10.7i | <i>ITP2-M;Blm<sup>m3/m3</sup></i>                | Lymphoma                                                                               |
| IB_10.7g | <i>ITP2-M;Blm<sup>m3/m3</sup></i>                | Lymphoma                                                                               |

**Supplementary Table 1. *Rosa26<sup>PB/+</sup>;Blm<sup>m3/m3</sup>* and *ITP2-M;Blm<sup>m3/m3</sup>* control mice with tumors.**  
 Overview of *Rosa26<sup>PB/+</sup>;Blm<sup>m3/m3</sup>* and *ITP2-M;Blm<sup>m3/m3</sup>* control mice displaying hematopoietic and solid tumors.

| Mouse ID  | Solid Tumor Diagnosis                                                                                                         |
|-----------|-------------------------------------------------------------------------------------------------------------------------------|
| IPB_1.2d  | Cervical mass                                                                                                                 |
| IPB_1.4e  | Adenocarcinoma of the uterus                                                                                                  |
| IPB_1.5a  | Squamous cell carcinoma; Dysplastic polyp in small intestine                                                                  |
| IPB_1.5b  | Bronchioalveolar adenocarcinoma                                                                                               |
| IPB_1.5f  | Astrocytoma                                                                                                                   |
| IPB_1.6d  | Poorly differentiated tumor in the neck                                                                                       |
| IPB_1.7d  | Pituitary adenoma; Lung adenoma                                                                                               |
| IPB_2.4b  | Pituitary adenoma                                                                                                             |
| IPB_2.4e  | Papillary lung adenoma                                                                                                        |
| IPB_2.6e  | Pituitary adenoma; Hamartoma in uterus                                                                                        |
| IPB_4.1d  | Adenosquamous carcinoma of the uterus                                                                                         |
| IPB_4.5g  | Squamous cell carcinoma; Mixed adenocarcinoma and squamous cell carcinoma of the stomach                                      |
| IPB_4.6d  | Papillary lung adenoma                                                                                                        |
| IPB_5.5e  | Pituitary adenoma                                                                                                             |
| IPB_6.2f  | Bronchoalveolar adenocarcinoma; Invasive adenocarcinoma of the uterus                                                         |
| IPB_8.1c  | Stomach adenocarcinoma                                                                                                        |
| IPB_9.2d  | Skin appendage tumor                                                                                                          |
| IPB_9.2g  | Papillary adenomatous polyp of the uterus; Pituitary adenoma                                                                  |
| IPB_9.6a  | Cystic endometrial hyperplasia; Squamous cell metaplasia plus dysplasia of the transitional epithelium of the urinary bladder |
| IPB_9.7d  | Adenomatous polyp of the uterus                                                                                               |
| IPB_10.4d | Astrocytoma                                                                                                                   |
| IPB_10.4e | Squamous cell carcinoma                                                                                                       |
| IPB_10.6b | Pituitary adenoma                                                                                                             |
| IPB_11.1c | Pituitary adenoma                                                                                                             |
| IPB_11.1d | Lung adenoma                                                                                                                  |
| IPB_11.5b | Prostate dysplasia                                                                                                            |
| IPB_12.1b | Pituitary adenoma                                                                                                             |
| IPB_12.3d | Hepatocellular carcinoma                                                                                                      |

**Supplementary Table 2. *IPB* mice with solid tumors.** Overview of all *ITP2-M; Rosa26<sup>PB/+</sup>; Blm<sup>m3/m3</sup>* (*IPB*) mice developing solid tumors that were characterized histopathologically.

| Gene A        | Gene B           | P-value | Adjusted P-value | Odds Ratio | LCL  | UCL     |
|---------------|------------------|---------|------------------|------------|------|---------|
| <i>Fas</i>    | <i>Gna13</i>     | 0.0008  | 0.02915          | 22.48      | 2.58 | 1099.87 |
| <i>Ptprc</i>  | <i>Mef2c</i>     | 0.0017  | 0.04666          | 17.75      | 2.09 | 855.32  |
| <i>Ebf1</i>   | <i>Gna13</i>     | 0.0011  | 0.03651          | 10.64      | 2.08 | 76.64   |
| <i>Ebf1</i>   | <i>Tmem131l</i>  | 0.0002  | 0.00880          | 1.00       | 3.4  | Inf     |
| <i>Tox</i>    | <i>Basp1</i>     | 0.0012  | 0.03724          | 12.45      | 2.15 | 136.86  |
| <i>Tox</i>    | <i>Erp44</i>     | 0.0004  | 0.01638          | 22.25      | 2.66 | 1064.94 |
| <i>Tox</i>    | <i>Pds5a</i>     | 0.0012  | 0.03651          | 1.00       | 2.41 | Inf     |
| <i>Zbtb20</i> | <i>Nf1</i>       | 0.0016  | 0.04595          | 9.91       | 2.11 | 59.16   |
| <i>Zbtb20</i> | <i>Pds5a</i>     | 0.0002  | 0.00792          | 1.00       | 4.03 | Inf     |
| <i>Zbtb20</i> | <i>Elf1</i>      | 0.0005  | 0.02041          | 12.54      | 2.58 | 78.83   |
| <i>Mef2c</i>  | <i>Elf1</i>      | 0.0016  | 0.04636          | 9.52       | 2.06 | 54.06   |
| <i>Nf1</i>    | <i>Etv6</i>      | 0.0004  | 0.01814          | 12.27      | 2.51 | 77.42   |
| <i>Basp1</i>  | <i>Tmem131l</i>  | 0.0008  | 0.02915          | 12.90      | 2.46 | 95.48   |
| <i>Basp1</i>  | <i>Hnrnpa2b1</i> | 0.0014  | 0.04189          | 12.77      | 2.1  | 144.8   |
| <i>Basp1</i>  | <i>Chd2</i>      | 0.0008  | 0.02915          | 21.18      | 2.38 | 1043.61 |
| <i>Phip</i>   | <i>Arid2</i>     | 0.0008  | 0.02915          | 24.39      | 2.52 | 1249.42 |
| <i>Nr3c1</i>  | <i>Chd2</i>      | 0.0008  | 0.02915          | 15.78      | 2.38 | 189.46  |
| <i>Rasa2</i>  | <i>Pds5a</i>     | 0.0012  | 0.03651          | 12.69      | 2.16 | 102.21  |
| <i>Rasa2</i>  | <i>Hnrnpu</i>    | 0.0003  | 0.01460          | 1.00       | 3.64 | Inf     |
| <i>Inpp5d</i> | <i>Elf1</i>      | 0.0012  | 0.03651          | 19.50      | 2.25 | 947.94  |

**Supplementary Table 3. Co-occurrence analysis of the top 50 CIS genes.** A Fisher's exact test was performed for co-occurrence interference of the top 50 CIS genes. Listed are the 20 unique pairs that remained significant after multiple testing correction (Benjamini-Hochberg). Associated odds ratios with the corresponding 95% confidence intervals are also shown. LCL, lower confidence limit; UCL, upper confidence limit; inf, infinite.

| Survival | Gene Name     | P-value | Adjusted P-value | Hazard Ratio | LCL   | UCL   | # Patients with LE (censored/total) | # Patients with HE (censored/total) |
|----------|---------------|---------|------------------|--------------|-------|-------|-------------------------------------|-------------------------------------|
| OS       | <i>ZCCHC7</i> | 0.00005 | 0.0055           | 0.56         | 0.396 | 0.792 | 110/212                             | 160/212                             |
| OS       | <i>TOX</i>    | 0.00006 | 0.006            | 0.562        | 0.398 | 0.792 | 112/212                             | 158/212                             |
| OS       | <i>NR3C1</i>  | 0.0001  | 0.00803          | 0.55         | 0.392 | 0.772 | 106/212                             | 164/212                             |
| OS       | <i>RFX7</i>   | 0.00015 | 0.00964          | 0.501        | 0.356 | 0.705 | 107/212                             | 163/212                             |
| OS       | <i>MEF2C</i>  | 0.00017 | 0.01028          | 0.583        | 0.419 | 0.812 | 118/212                             | 152/212                             |
| OS       | <i>EBF1</i>   | 0.00019 | 0.01087          | 0.556        | 0.399 | 0.777 | 125/212                             | 145/212                             |
| OS       | <i>GNA13</i>  | 0.00021 | 0.01105          | 0.58         | 0.413 | 0.815 | 112/212                             | 158/212                             |
| OS       | <i>PPP6R3</i> | 0.00084 | 0.02356          | 0.541        | 0.388 | 0.755 | 124/212                             | 176/212                             |
| OS       | <i>MBNL1</i>  | 0.00173 | 0.03502          | 0.563        | 0.402 | 0.789 | 106/212                             | 164/212                             |
| OS       | <i>ZBTB20</i> | 0.00182 | 0.03579          | 0.647        | 0.466 | 0.897 | 133/212                             | 137/212                             |
| OS       | <i>ERP44</i>  | 0.00279 | 0.04416          | 0.619        | 0.444 | 0.862 | 111/212                             | 159/212                             |
| PFS      | <i>ZCCHC7</i> | 0.00001 | 0.00379          | 0.536        | 0.382 | 0.752 | 111/212                             | 156/212                             |
| PFS      | <i>TOX</i>    | 0.00013 | 0.01535          | 0.599        | 0.429 | 0.836 | 113/212                             | 154/212                             |
| PFS      | <i>MEF2C</i>  | 0.0002  | 0.01998          | 0.606        | 0.436 | 0.841 | 119/212                             | 148/212                             |
| PFS      | <i>EBF1</i>   | 0.00022 | 0.02076          | 0.576        | 0.416 | 0.796 | 123/212                             | 144/212                             |
| PFS      | <i>RFX7</i>   | 0.0011  | 0.04538          | 0.559        | 0.405 | 0.773 | 115/212                             | 152/212                             |
| PFS      | <i>NR3C1</i>  | 0.00111 | 0.04541          | 0.624        | 0.451 | 0.864 | 111/212                             | 156/212                             |
| PFS      | <i>GNA13</i>  | 0.00148 | 0.05295          | 0.649        | 0.468 | 0.899 | 111/212                             | 156/212                             |
| PFS      | <i>ERP44</i>  | 0.00189 | 0.05859          | 0.618        | 0.448 | 0.854 | 115/212                             | 152/212                             |
| PFS      | <i>PPP6R3</i> | 0.0022  | 0.0621           | 0.578        | 0.419 | 0.798 | 128/212                             | 164/212                             |
| PFS      | <i>MBNL1</i>  | 0.00276 | 0.06895          | 0.585        | 0.423 | 0.809 | 110/212                             | 157/212                             |
| PFS      | <i>ZBTB20</i> | 0.01142 | 0.13193          | 0.73         | 0.528 | 1.007 | 133/212                             | 137/212                             |

**Supplementary Table 4. Clinical relevance of CIS genes in human DLBCL.** Human orthologues of genes from the top 50 CIS list (with tumor suppressive function; *MALT1* and *REL* excluded) for which low expression significantly correlates with poor overall survival (OS) in a human diffuse large B-cell lymphoma dataset (GSE31312 [ $n=424$  patients]) are listed. For these genes, data for association with progression-free survival (PFS) are also shown. For each gene, the cohort was stratified into "low" (LE; below median expression) or "high" expression (HE, above median). LCL, lower confidence limit; UCL, upper confidence limit; #, number.
